# Supplementary material for: Complete nontuberculous mycobacteria whole genomes using an optimized DNA extraction protocol for long-read sequencing
Source: PubMed Central journal article supplement (PMC6822416; doi:10.1186/s12864-019-6134-y), 2019-10-30
Supplement: 12864_2019_6134_MOESM2_ESM.pdf [file 12864_2019_6134_MOESM2_ESM.pdf]

**Supplemental Table 1. Previous grid experiments.** Here we provide an outline of previous extractions, variations in protocols, and extraction quantity and quality measurements that led to the development of our optimized method.

| CHOP ID | Pellet weight | Lysis buffer <sup>+</sup> | Bead-beating <sup>*</sup> | Bead quantity | SDS   | Phenol <sup>†</sup> | Precipitation Temp/<br>Reagent <sup>‡</sup> | Precipitation salt <sup>§</sup> | Total DNA | 260/280 | 260/230 | Gel visual peak (kb) |
|---------|---------------|---------------------------|---------------------------|---------------|-------|---------------------|---------------------------------------------|---------------------------------|-----------|---------|---------|----------------------|
| 101011  | n/a           | TLB                       | None                      | n/a           | Late  | No Phenol           | Cold ETOH                                   | NaOAc                           | 0.092     | 0.86    | 0.28    | Faint/no peak        |
| 101031  | n/a           | TLB                       | None                      | n/a           | Late  | No Phenol           | Cold ETOH                                   | NaOAc                           | 0.051     | 1.11    | 0.36    | Faint/no peak        |
| 101101  | n/a           | TLB                       | None                      | n/a           | Late  | No Phenol           | Cold ETOH                                   | NaOAc                           | 0.059     | 1.62    | 1.06    | Faint/no peak        |
| 101111  | n/a           | TLB                       | None                      | n/a           | Late  | No Phenol           | Cold ETOH                                   | NaOAc                           | 0.145     | 1.54    | 0.58    | Faint/no peak        |
| 101151  | n/a           | TLB                       | None                      | n/a           | Late  | No Phenol           | Cold ETOH                                   | NaOAc                           | 0.205     | 1.69    | 1.47    | Faint/no peak        |
| 101161  | n/a           | TLB                       | None                      | n/a           | Late  | No Phenol           | Cold ETOH                                   | NaOAc                           | 0.206     | 1.53    | 0.67    | Faint/no peak        |
| 101171  | n/a           | TLB                       | None                      | n/a           | Late  | No Phenol           | Cold ETOH                                   | NaOAc                           | 0.261     | 1.81    | 1.46    | Faint/no peak        |
| 101201  | n/a           | TLB                       | None                      | n/a           | Late  | No Phenol           | Cold ETOH                                   | NaOAc                           | 0.198     | 1.52    | 0.65    | Faint/no peak        |
| 101211  | n/a           | TLB                       | None                      | n/a           | Late  | No Phenol           | Cold ETOH                                   | NaOAc                           | 0.130     | 1.62    | 0.56    | Faint/no peak        |
| 101241  | n/a           | TLB                       | None                      | n/a           | Late  | No Phenol           | Cold ETOH                                   | NaOAc                           | 0.074     | 2.18    | 0.95    | Faint/no peak        |
| 101175a | 35 mg         | KSB                       | Early                     | 150 mg        | Early | No Phenol           | Cold ETOH                                   | NaOAc                           | 2.324     | 1.06    | n/a     | >48                  |
| 101175b | 35 mg         | KSB                       | None                      | n/a           | Early | No Phenol           | Cold ETOH                                   | NaOAc                           | 0.159     | 0.70    | n/a     | empty                |
| 101175c | 35 mg         | TLB                       | Early                     | 150 mg        | Early | No Phenol           | Cold ETOH                                   | NaOAc                           | 5.908     | 0.83    | n/a     | >48                  |
| 101175d | 35 mg         | TLB                       | None                      | n/a           | Early | No Phenol           | Cold ETOH                                   | NaOAc                           | 0.410     | 0.67    | n/a     | empty                |
| 101032a | 30 mg         | KSB                       | None                      | n/a           | Early | No Phenol           | Cold ETOH                                   | NaOAc                           | 0.267     | 0.80    | n/a     | empty                |
| 101032b | 30 mg         | TLB                       | None                      | n/a           | Early | No Phenol           | Cold ETOH                                   | NaOAc                           | 0.178     | 0.70    | n/a     | empty                |
| 101115a | 55 mg         | TLB                       | Early                     | 100 mg        | Early | No Phenol           | Cold ETOH                                   | NaOAc                           | 2.240     | 0.89    | 0.5     | >48                  |
| 101115b | 55 mg         | TLB                       | Early                     | 150 mg        | Early | No Phenol           | Cold ETOH                                   | NaOAc                           | 7.210     | 2.33    | -5.61   | >48                  |
| 101155a | 70 mg         | TLB                       | Early                     | 100 mg        | Early | No Phenol           | Cold ETOH                                   | NaOAc                           | 3.409     | 1.32    | -10.38  | >48                  |
| 101155b | 70 mg         | TLB                       | Early                     | 150 mg        | Early | No Phenol           | Cold ETOH                                   | NaOAc                           | 9.660     | 1.02    | 0.61    | >48                  |
| 101204a | 70 mg         | TLB                       | Early                     | 100 mg        | Early | No Phenol           | Cold ETOH                                   | NaOAc                           | 4.459     | 2.26    | -0.66   | >48                  |
| 101204b | 70 mg         | TLB                       | Early                     | 150 mg        | Early | No Phenol           | Cold ETOH                                   | NaOAc                           | 10.360    | 1.81    | 7.69    | >48                  |
| 101245a | 60 mg         | TLB                       | Early                     | 100 mg        | Early | No Phenol           | Cold ETOH                                   | NaOAc                           | 2.219     | 0.73    | 0.38    | >48                  |
| 101245b | 60 mg         | TLB                       | Early                     | 150 mg        | Early | No Phenol           | Cold ETOH                                   | NaOAc                           | 7.210     | 0.78    | 0.35    | >48                  |
| 101033a | 60 mg         | TLB                       | Early                     | 150 mg        | Early | Phenol              | RT/2-Prop                                   | NaCl                            | 5.115     | 1.78    | 2.79    | >48                  |
| 101033b | 154mg         | TLB                       | Early                     | 150 mg        | Early | Phenol              | RT/2-Prop                                   | NaCl                            | 5.115     | 1.74    | 3.06    | >48                  |
| 101034a | 100 mg        | TLB                       | Early                     | 150 mg        | Early | Phenol              | RT/2-Prop                                   | NaCl                            | 4.433     | 1.86    | 2.42    | >48                  |
| 101034b | 49 mg         | TLB                       | Early                     | 150 mg        | Early | Phenol              | RT/2-Prop                                   | NaCl                            | 4.620     | 1.87    | 2.58    | >48                  |
| 101115  | 93 mg         | TLB                       | Early                     | 150 mg        | Early | Phenol              | RT/2-Prop                                   | NaCl                            | 4.587     | 1.90    | 2.56    | >48                  |
| 101174a | 31 mg         | TLB                       | Early                     | 150 mg        | Early | Phenol              | RT/2-Prop                                   | NaCl                            | 4.136     | 1.79    | 3.23    | >48                  |
| 101174b | 77 mg         | TLB                       | Early                     | 150 mg        | Early | Phenol              | RT/2-Prop                                   | NaCl                            | 4.048     | 1.84    | 2.67    | >48                  |
| 101931  | 76 mg         | TLB                       | Early                     | 150 mg        | Early | Phenol              | RT/2-Prop                                   | NaCl                            | 4.114     | 1.87    | 2.70    | >48                  |
| 101932  | 103 mg        | TLB                       | Early                     | 150 mg        | Early | Phenol              | RT/2-Prop                                   | NaCl                            | 3.124     | 1.93    | 2.56    | >48                  |
| 101941  | 122 mg        | TLB                       | Early                     | 150 mg        | Early | Phenol              | RT/2-Prop                                   | NaCl                            | 3.278     | 1.76    | 3.11    | >48                  |
| 1011432 | 105 mg        | TLB                       | Early                     | 150 mg        | Early | Phenol              | RT/2-Prop                                   | NaCl                            | 3.168     | 1.77    | 2.07    | >48                  |

<sup>+</sup> Total Lysis Buffer (TLB), developed by Josh Quick and available on protocols.io, is described in our full protocol (Supplemental Material 1) (36). KSB refers to a “Käser specific buffer”, which is described in Käser et al. (32).

<sup>\*</sup> “Early” bead-beating refers to the timing prior to enzymatic digestion; “Late” bead-beating refers to timing after enzymatic digestion. All Early bead-beating was done in high SDS concentration.

† DNA extractions in “no phenol” were extracted as described in Methods with chloroform:isoamyl alcohol (24:1, Tris-saturated). Extractions in “phenol” were extracted using phenol:chloroform:isoamyl alcohol (25:24:1, Tris-saturated, pH 8.0)

‡ Precipitation reagent was either RT 2-Prop (room temperature isopropanol) or Cold ETOH (ethanol).

¶ Precipitation salt was either 3 M sodium acetate (pH 5.2) or 5 M NaCl.
