# Supplementary material for: Complete nontuberculous mycobacteria whole genomes using an optimized DNA extraction protocol for long-read sequencing
Source: PubMed Central journal article supplement (PMC6822416; doi:10.1186/s12864-019-6134-y), 2019-10-30
Supplement: 12864_2019_6134_MOESM3_ESM.pdf [file 12864_2019_6134_MOESM3_ESM.pdf]

**Supplemental Table 2. DNA extraction and ONT sequencing statistics for additional 8 samples.** Eight NTM isolates from 8 different patients were extracted by our optimized method and sequenced on the ONT MinION. Notably, SPRI bead size selection was completed on all samples and input DNA was increased to 1000 µg for this sequencing run. The ONT Rapid Barcoding Kit was again used. There were no significant differences between MAC and MAB strains when comparing any of the listed statistics (unpaired, parametric t-test), nor were there any significant differences in any listed statistics when compared to the previous ONT sequencing run without size selection. Two outliers were observed with higher total reads and total bases (CHOP118112 and CHOP1500921), which may reflect variability of adapter annealing during barcoding preparation. Decreased throughput is observed compared to the ONT MinION runs with fewer barcoded samples, as expected.

|             | NTM species complex | Total DNA (µg) | 260/280 | 260/230 | Total reads | Total bases | Mean read length (bp) | Median read length (bp) | Longest read | Phred score | %Error Probability <sup>‡</sup> |
|-------------|---------------------|----------------|---------|---------|-------------|-------------|-----------------------|-------------------------|--------------|-------------|---------------------------------|
| CHOP101931  | MAC                 | 8.88           | 1.8     | 2.04    | 64,951      | 123182184   | 1,896.50              | 1201                    | 44026        | 13          | 5.011%                          |
| CHOP1121241 | MAC                 | 4.47           | 1.91    | 2.08    | 155515      | 230877806   | 1,484.60              | 886                     | 33612        | 13          | 5.011%                          |
| CHOP1131461 | MAB                 | 5.85           | 1.91    | 2.06    | 96795       | 134789658   | 1,392.50              | 847                     | 30730        | 13          | 5.011%                          |
| CHOP1181112 | MAB                 | 11.22          | 1.91    | 2.13    | 367144      | 499130372   | 1,359.50              | 873                     | 29997        | 13          | 5.011%                          |
| CHOP1221001 | MAB                 | 7.44           | 1.91    | 2.12    | 114012      | 117440530   | 1,030.10              | 637                     | 18290        | 13          | 5.011%                          |
| CHOP1301681 | MAC                 | 12.48          | 1.93    | 2.09    | 113689      | 221631613   | 1,657.80              | 1023                    | 40205        | 13          | 5.011%                          |
| CHOP1500921 | MAC                 | 6.06           | 1.92    | 2.1     | 229903      | 588298373   | 2,558.90              | 1318                    | 59632        | 13          | 5.011%                          |
| CHOP1511191 | MAC                 | 2.814          | 1.89    | 2.1     | 128596      | 161015783   | 1,252.10              | 778                     | 23217        | 13          | 5.011%                          |

<sup>†</sup> Coverage per sequenced genome, calculated by  $C = LN/G$ , where L=average read length, N=number of reads, G=genome size of 5.2 Mb.

<sup>‡</sup> Error probability percentage is a function of Mean Phred score, where probability  $P\% = 100 \cdot 10^{(-Phred/10)}$ .
