# Supplementary material for: Complete nontuberculous mycobacteria whole genomes using an optimized DNA extraction protocol for long-read sequencing
Source: PubMed Central journal article supplement (PMC6822416; doi:10.1186/s12864-019-6134-y), 2019-10-30
Supplement: 12864_2019_6134_MOESM5_ESM.pdf [file 12864_2019_6134_MOESM5_ESM.pdf]

**Supplemental Table 4. Strain List of extractions by optimized method (Method 5).** Listed below are the source, date collected, and extraction quality measures for all isolates described that were extracted by Method 5.

| Sample      | NTM species complex | Source | Primary diagnosis | Date Collected | Total DNA ( $\mu$ g)<br>(Qubit) | 260/280<br>(Nanodrop) | 260/230<br>(Nanodrop) |
|-------------|---------------------|--------|-------------------|----------------|---------------------------------|-----------------------|-----------------------|
| CHOP101034  | MAC                 | Human  | Cystic Fibrosis   | 2017-02-13     | 5.247                           | 1.86                  | 2.42                  |
| CHOP101115  | MAC                 | Human  | Cystic Fibrosis   | 2017-08-01     | 5.302                           | 1.90                  | 2.56                  |
| CHOP101174  | MAC                 | Human  | Cystic Fibrosis   | 2016-08-24     | 5.082                           | 1.84                  | 2.67                  |
| CHOP101033a | MAC                 | Human  | Cystic Fibrosis   | 2017-02-13     | 5.115                           | 1.78                  | 2.79                  |
| CHOP101033b | MAC                 | Human  | Cystic Fibrosis   | 2017-02-13     | 5.115                           | 1.74                  | 3.06                  |
| CHOP101034a | MAC                 | Human  | Cystic Fibrosis   | 2017-02-13     | 4.433                           | 1.86                  | 2.42                  |
| CHOP101034b | MAC                 | Human  | Cystic Fibrosis   | 2017-02-13     | 4.620                           | 1.87                  | 2.58                  |
| CHOP101115  | MAC                 | Human  | Cystic Fibrosis   | 2017-08-01     | 4.587                           | 1.90                  | 2.56                  |
| CHOP101174a | MAC                 | Human  | Cystic Fibrosis   | 2016-08-24     | 4.136                           | 1.79                  | 3.23                  |
| CHOP101174b | MAC                 | Human  | Cystic Fibrosis   | 2016-08-24     | 4.048                           | 1.84                  | 2.67                  |
| CHOP101931  | MAC                 | Human  | Cystic Fibrosis   | 2013-11-05     | 4.114                           | 1.87                  | 2.70                  |
| CHOP101932  | MAC                 | Human  | Cystic Fibrosis   | 2013-11-05     | 3.124                           | 1.93                  | 2.56                  |
| CHOP101941  | MAC                 | Human  | Cystic Fibrosis   | 2013-11-02     | 3.278                           | 1.76                  | 3.11                  |
| CHOP1011432 | MAC                 | Human  | Cystic Fibrosis   | 2017-06-07     | 3.168                           | 1.77                  | 2.07                  |
| CHOP1081071 | MAB                 | Human  | Cystic Fibrosis   | 2018-08-08     | 2.431                           | 1.73                  | 2.03                  |
| CHOP112972  | MAC                 | Human  | Cystic Fibrosis   | 2014-02-21     | 2.255                           | 1.86                  | 2.10                  |
| CHOP1121241 | MAB                 | Human  | Cystic Fibrosis   | 2014-12-08     | 5.335                           | 1.84                  | 2.05                  |
| CHOP1131081 | MAB                 | Human  | Cystic Fibrosis   | 2015-02-17     | 4.961                           | 1.78                  | 1.92                  |
| CHOP1131151 | MAB                 | Human  | Cystic Fibrosis   | 2014-10-07     | 5.038                           | 1.86                  | 2.08                  |
| CHOP1131461 | MAB                 | Human  | Cystic Fibrosis   | 2017-10-24     | 5.115                           | 1.89                  | 2.09                  |
| CHOP118501  | MAB                 | Human  | Cystic Fibrosis   | 2011-12-13     | 5.412                           | 1.94                  | 2.20                  |
| CHOP118911  | MAB                 | Human  | Cystic Fibrosis   | 2013-05-14     | 4.246                           | 1.90                  | 2.12                  |
| CHOP118951  | MAC                 | Human  | Cystic Fibrosis   | 2018-06-21     | 4.037                           | 1.88                  | 1.98                  |

|             |     |       |                 |            |       |      |      |
|-------------|-----|-------|-----------------|------------|-------|------|------|
| CHOP118952  | MAB | Human | Cystic Fibrosis | 2018-06-21 | 4.642 | 1.90 | 2.02 |
| CHOP1181111 | MAB | Human | Cystic Fibrosis | 2014-10-08 | 4.257 | 1.86 | 1.95 |
| CHOP1181112 | MAB | Human | Cystic Fibrosis | 2014-10-08 | 4.312 | 1.93 | 2.15 |
| CHOP1181161 | MAB | Human | Cystic Fibrosis | 2014-10-10 | 4.367 | 1.98 | 2.37 |
| CHOP122621  | MAB | Human | Cystic Fibrosis | 2012-06-23 | 4.125 | 1.88 | 2.10 |
| CHOP122841  | MAB | Human | Cystic Fibrosis | 2018-02-19 | 3.872 | 1.91 | 2.09 |
| CHOP1221001 | MAB | Human | Cystic Fibrosis | 2013-07-31 | 3.795 | 2.00 | 2.25 |
| CHOP1221061 | MAB | Human | Cystic Fibrosis | 2013-09-09 | 3.960 | 1.97 | 2.21 |
| CHOP1221381 | MAB | Human | Cystic Fibrosis | 2014-12-08 | 3.916 | 1.97 | 2.19 |
| CHOP1221671 | MAB | Human | Cystic Fibrosis | 2013-07-12 | 3.553 | 1.89 | 2.15 |
| CHOP1221821 | MAB | Human | Cystic Fibrosis | 2013-06-19 | 3.509 | 1.97 | 2.20 |
| CHOP1301681 | MAB | Human | Cystic Fibrosis | 2013-06-12 | 3.718 | 1.92 | 2.10 |
| CHOP1301861 | MAC | Human | Cystic Fibrosis | 2013-06-12 | 3.531 | 1.91 | 2.09 |
| CHOP1511091 | MAB | Human | Cystic Fibrosis | 2015-03-14 | 3.553 | 1.92 | 2.14 |
| CHOP1511191 | MAB | Human | Cystic Fibrosis | 2014-12-12 | 3.179 | 1.92 | 2.12 |
| CHOP1511331 | MAB | Human | Cystic Fibrosis | 2015-03-15 | 3.278 | 1.94 | 2.21 |
| CHOP1511391 | MAB | Human | Cystic Fibrosis | 2015-03-16 | 3.168 | 1.95 | 2.20 |
| CHOP1511631 | MAB | Human | Cystic Fibrosis | 2014-07-10 | 2.431 | 1.87 | 2.07 |
