# Supplementary material for: Complete nontuberculous mycobacteria whole genomes using an optimized DNA extraction protocol for long-read sequencing
Source: PubMed Central journal article supplement (PMC6822416; doi:10.1186/s12864-019-6134-y), 2019-10-30
Supplement: 12864_2019_6134_MOESM6_ESM.pdf [file 12864_2019_6134_MOESM6_ESM.pdf]

**Supplemental Table 3. Short-read Statistics.** Short-reads were sequenced by Illumina HiSeq 2500 after Nextera XT library preparation, demultiplexed with DNAbc, and trimming with Trim Galore! (42, 43). No significant differences were found between the sequenced samples with regard to total reads or quality by Phred score (unpaired t-tests).

| Sample     | Avg. read length (bp) | Total reads | % GC | Avg. Phred Score |
|------------|-----------------------|-------------|------|------------------|
| CHOP101034 | 126                   | 2421793     | 67   | 36.9             |
| CHOP101115 | 126                   | 2485526     | 65   | 36.9             |
| CHOP101174 | 126                   | 2348600     | 67   | 36.9             |
